# Supplementary material for: RASAL2 down-regulation in ovarian cancer promotes epithelial-mesenchymal transition and metastasis
Source: PubMed Central journal article supplement (PMC4196159; doi:10.18632/oncotarget.2244), 2014-07-23
Supplement: oncotarget-05-6734-s001.pdf [file oncotarget-05-6734-s001.pdf]

## RASAL2 down-regulation in ovarian cancer promotes epithelial-mesenchymal transition and metastasis

### Supplementary Material

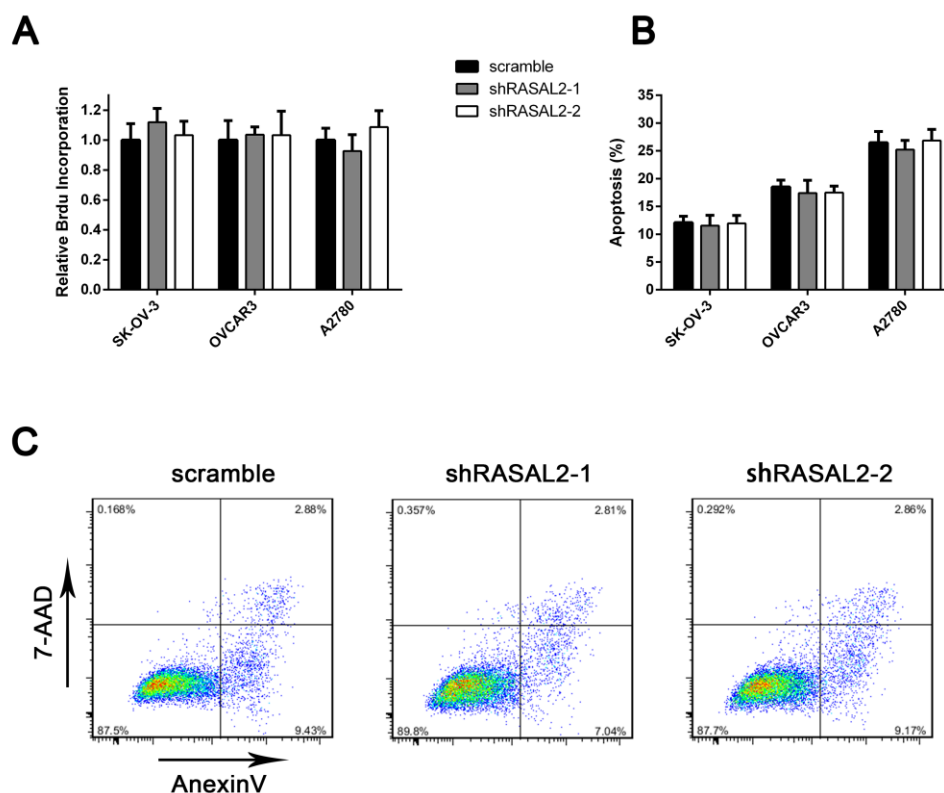

**Supplementary Figure 1: RASAL2 depletion does not affect ovarian cancer cell proliferation and cisplatin induced apoptosis** (A) Assay for cell proliferation on SK-OV-3, OVCAR3 and A2780 cells infected with shRASAL2-1, shRASAL2-2 or scramble-shRNA by a Cell Proliferation ELISA (BrdU) kit. All the data were normalized to the results of cells transfected with scramble-shRNA. The data are shown as the means  $\pm$  SD (n=3). (B) SK-OV-3, OVCAR3 and A2780 cells infected with shRASAL2-1, shRASAL2-2 or scramble-shRNA were treated with cisplatin (10 $\mu$ g/ml) for 24h, then examined for apoptosis by flow cytometry. The data are shown as the means  $\pm$  SD (n=3). (C) Representative graphs of SK-OV-3 cells apoptosis results. \*, P < 0.05, \*\*, P < 0.01.

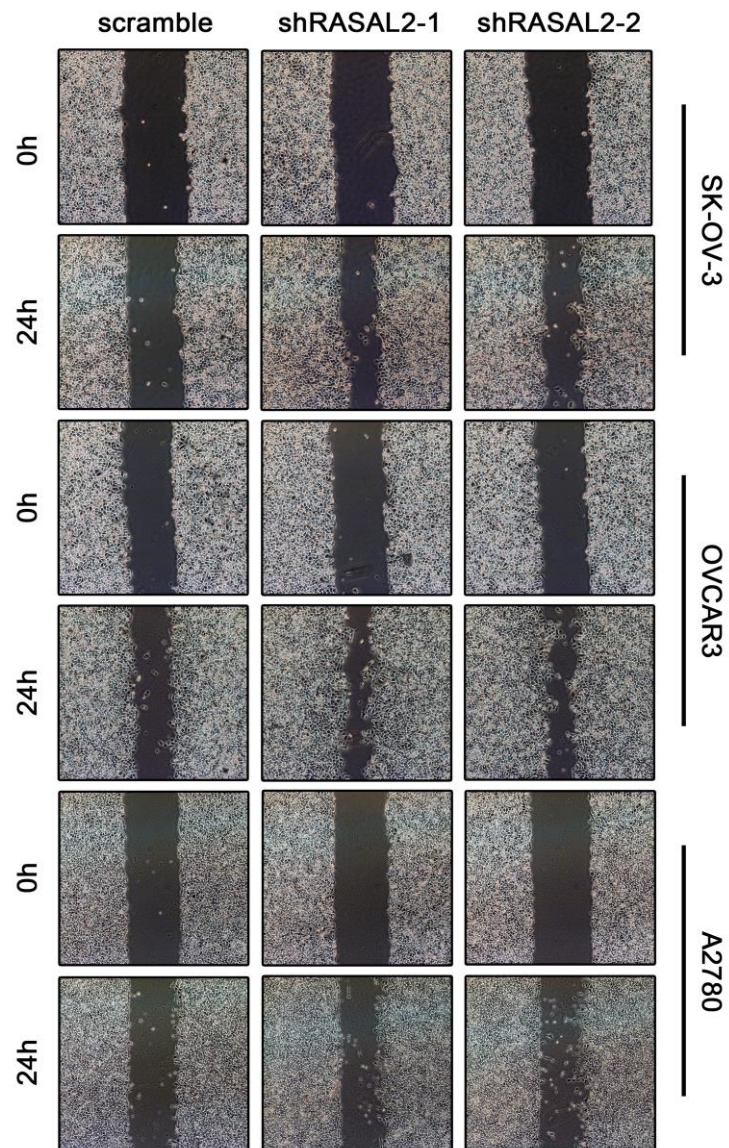

**Supplementary Figure 2: RASAL2 depletion enhanced ovarian cancer cells migration** SK-OV-3, OVCAR3 and A2780 cells infected with shRASAL2-1, shRASAL2-2 or scramble-shRNA were subjected for wound healing assay.

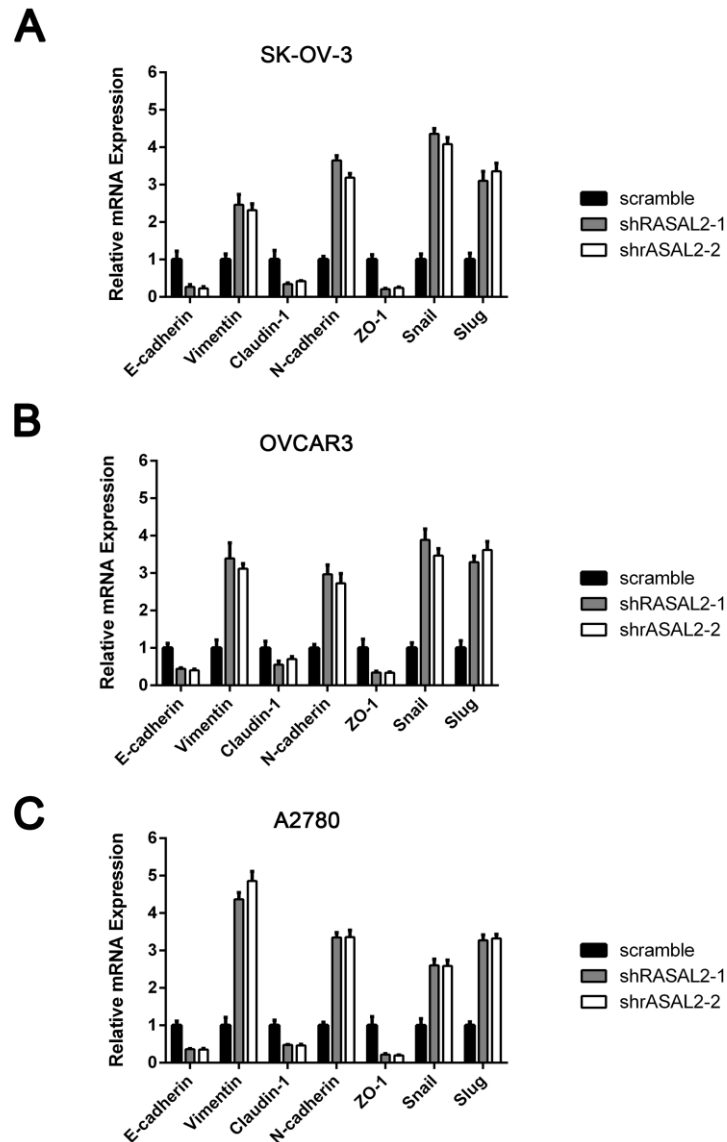

**Supplementary Figure 3: RASAL2 depletion altered mRNA expression of EMT markers (A, B and C)** qPCR analysis of EMT markers levels in SK-OV-3, OVCAR3 and A2780 cells infected with shRASAL2-1, shRASAL2-2 or scramble-shRNA. All the data were normalized to the results of cells transfected with scramble-shRNA. The data are shown as the means  $\pm$  SD (n=3). \*,  $P < 0.05$ , \*\*,  $P < 0.01$ .

**Supplementary Table-1:****Details of patients' samples**

| study_id | Age | Tumor_stage | Tumor_grade | Histology  | Epithelial_type      |
|----------|-----|-------------|-------------|------------|----------------------|
| OC_01    | 20  | I           | Grade1      | epithelial | mucous               |
| OC_02    | 48  | II          | Grade1      | epithelial | mucous               |
| OC_03    | 14  | I           | Grade1      | epithelial | mucous               |
| OC_04    | 56  | IV          | Grade2      | epithelial | serous               |
| OC_05    | 53  | II          | Grade3      | epithelial | serous               |
| OC_06    | 50  | II          | Grade3      | epithelial | serous               |
| OC_07    | 47  | II          | Grade3      | epithelial | serous               |
| OC_08    | 39  | III         | Grade1      | epithelial | serous               |
| OC_09    | 35  | IV          | Grade1      | epithelial | serous               |
| OC_10    | 60  | IV          | Grade2      | epithelial | serous               |
| OC_11    | 61  | II          | Grade2      | epithelial | serous               |
| OC_12    | 65  | II          | Grade2      | epithelial | mucous               |
| OC_13    | 38  | I           | Grade1      | epithelial | serous               |
| OC_14    | 67  | II          | Grade2      | epithelial | serous               |
| OC_15    | 59  | I           | Grade1      | epithelial | serous               |
| OC_16    | 58  | II          | Grade3      | epithelial | endometrioid         |
| OC_17    | 60  | II          | Grade3      | epithelial | endometrioid         |
| OC_18    | 51  | II          | Grade3      | epithelial | endometrioid         |
| OC_19    | 44  | IV          | Grade3      | epithelial | endometrioid         |
| OC_20    | 64  | IV          | Grade1      | epithelial | serous               |
| OC_21    | 58  | IV          | Grade2      | epithelial | mucous               |
| OC_22    | 54  | II          | Grade3      | epithelial | clear cell carcinoma |
| OC_23    | 51  | IV          | Grade2      | epithelial | serous               |
| OC_24    | 73  | IV          | Grade3      | epithelial | serous               |
| OC_25    | 57  | IV          | Grade2      | epithelial | serous               |
| OC_26    | 56  | IV          | Grade2      | epithelial | serous               |
| OC_27    | 61  | IV          | Grade3      | epithelial | endometrioid         |
| OC_28    | 53  | III         | Grade3      | epithelial | serous               |
| OC_29    | 64  | III         | Grade3      | epithelial | clear cell carcinoma |
| OC_30    | 44  | IV          | Grade3      | epithelial | serous               |
| OC_31    | 53  | IV          | Grade3      | epithelial | endometrioid         |
| OC_32    | 72  | IV          | Grade2      | epithelial | serous               |
| OC_33    | 50  | III         | Grade3      | epithelial | endometrioid         |
| OC_34    | 58  | III         | Grade3      | epithelial | endometrioid         |
| OC_35    | 64  | IV          | Grade3      | epithelial | serous               |
| OC_36    | 45  | III         | Grade2      | epithelial | endometrioid         |

|       |    |     |        |            |                      |
|-------|----|-----|--------|------------|----------------------|
| OC_37 | 60 | IV  | Grade3 | epithelial | endometrioid         |
| OC_38 | 50 | IV  | Grade3 | epithelial | mucous               |
| OC_39 | 61 | III | Grade3 | epithelial | clear cell carcinoma |
| OC_40 | 42 | IV  | Grade3 | epithelial | endometrioid         |
| OC_41 | 66 | II  | Grade3 | epithelial | mucous               |
| OC_42 | 51 | III | Grade2 | epithelial | serous               |
| OC_43 | 47 | IV  | Grade3 | epithelial | mucous               |
| OC_44 | 68 | IV  | Grade3 | epithelial | serous               |
| OC_45 | 59 | IV  | Grade2 | epithelial | serous               |
| OC_46 | 69 | IV  | Grade3 | epithelial | serous               |
| OC_47 | 69 | IV  | Grade2 | epithelial | serous               |
| OC_48 | 45 | II  | Grade3 | epithelial | endometrioid         |
| OC_49 | 74 | III | Grade3 | epithelial | endometrioid         |
| OC_50 | 56 | IV  | Grade2 | epithelial | serous               |
| OC_51 | 69 | II  | Grade3 | epithelial | clear cell carcinoma |
| OC_52 | 72 | IV  | Grade2 | epithelial | serous               |
| OC_53 | 68 | IV  | Grade3 | epithelial | endometrioid         |
| OC_54 | 41 | II  | Grade3 | epithelial | serous               |
| OC_55 | 67 | III | Grade3 | epithelial | mucous               |
| OC_56 | 44 | IV  | Grade3 | epithelial | serous               |
| OC_57 | 48 | IV  | Grade3 | epithelial | serous               |
| OC_58 | 38 | N   | N      | epithelial | NA                   |
| OC_59 | 56 | N   | N      | epithelial | NA                   |
| OC_60 | 44 | N   | N      | epithelial | NA                   |
| OC_61 | 48 | N   | N      | epithelial | NA                   |
| OC_62 | 39 | N   | N      | epithelial | NA                   |
| OC_63 | 59 | N   | N      | epithelial | NA                   |
| OC_64 | 61 | N   | N      | epithelial | NA                   |
| OC_65 | 62 | N   | N      | epithelial | NA                   |
